# Supplementary material for: Circulating microRNA-423 attenuates the phosphorylation of calcium handling proteins in atrial fibrillation
Source: PubMed Central journal article supplement — Mol Med Rep. 2022 Mar 28;25(5):186. doi: 10.3892/mmr.2022.12702 (PMC8985206; doi:10.3892/mmr.2022.12702), 2022-03-28

Figure S1. Regulation of miR-423 by miR mimic and inhibitor. Reverse transcription-quantitative PCR analysis of miR-423 levels in HL-1 cells transfected with miR-423 mimic NC, mimic, inhibitor negative control and inhibitor. Each column represents mean  $\pm$  SEM of at least five separate experiments. \* $P < 0.01$ . NC, negative control; miR, microRNA.

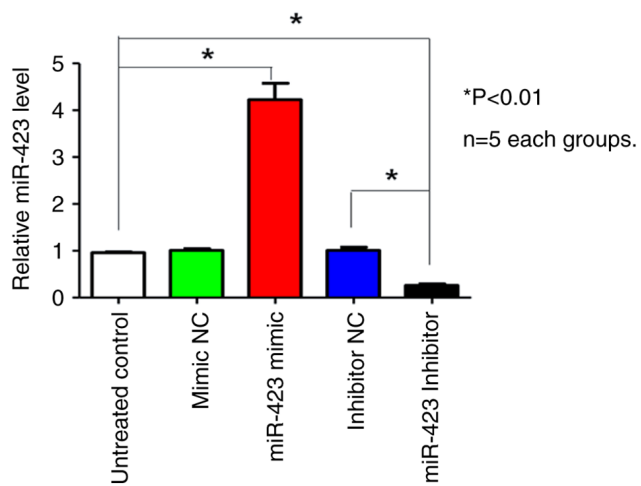

Figure S2. Microarray analysis of miRNAs in patients with AF. (A) Dendrogram and heat map representation of differential miR expression between patients with PSVT and AF, showing enhanced (red) and reduced (blue) miR levels. (B) Volcano plot of the differentially expressed miRNAs in patients with PSVT and AF. The y-axis indicates the  $-\log_{10}$  of the P-values and the x-axis is the fold-change (measured as the  $\log_2$  transformed ratio of the expression between both experimental groups). (C) Seven miRNAs differentially expressed in AF, with at least 2-fold differences in the expression and adjusted P-value  $<0.05$ . miRNA/miR, microRNA; AF, atrial fibrillation; PSVT, paroxysmal supraventricular tachycardia.

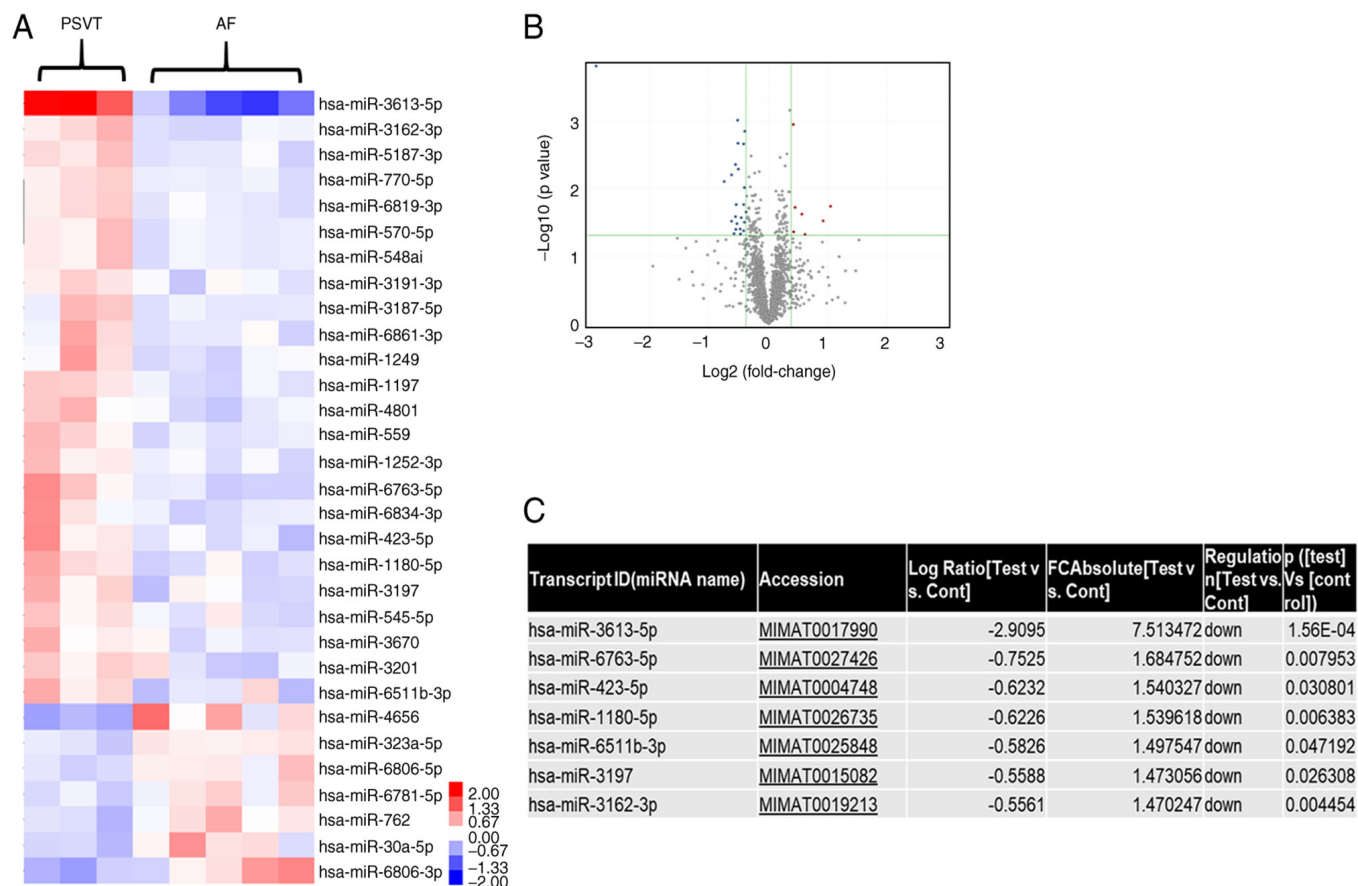

Supplement: Supplementary_Data.pdf [file Supplementary_Data.pdf]
